# Supplementary material
Source: ML conference proceedings conference paper supplement (https://openaccess.thecvf.com/content/CVPR2024/html/Wang_De-confounded_Data-free_Knowledge_CVPR_2024_paper.html)
Supplement: Supplementary file 1 [file Wang_De-confounded_Data-free_Knowledge_CVPR_2024_supplemental.pdf]

# De-confounded Data-free Knowledge Distillation for Handling Distribution Shifts

## Supplementary Material

In this supplementary material, we provide more details of our method, organized as follows:

- In Section 1, we provide the detailed training settings and illustrate how KDCI combines with existing DFKD methods, and show the algorithm process, corresponding to Section 4.3 of the main body.
- In Section 2, we qualitatively assess students' learning progress about vanilla DFKD methods and their KDCI-based version to verify the positive effect of KDCI on the existing DFKD method.
- In Section 3, we analyze the possible reasons for the difference in performance improvement, corresponding to Section 4 of the main body.
- In Section 4, we provide more observable visualization results as more sufficient evidence, corresponding to Section 4.7 of the main body.
- In Section 5, we discuss the significant differences between our KDCI and other methods focusing on data distribution.
- In Section 6, we discuss the broader impact and potential limitations.
- In Section 7, we provide the detailed experimental settings for the used baseline methods, corresponding to Section 4.2 of the main body.

## 1. Additional Training Details & Algorithm Process of Combining KDCI with Existing DFKD Methods

### 1.1. Training Details

We provide the detailed experimental settings for our KDCI framework. Our KDCI and reproducible methods are implemented through PyTorch [11]. All models are trained on RTX 3090 GPUs. **For CIFAR-10 and CIFAR-100**, all training settings (*e.g.*, loss function, optimizer, batch size, learning rate, etc) of the reported methods are consistent with the released codebase. The results are shown in Table 1 of the main body. **For Tiny-ImageNet**, initially, we try to find a unified teacher model for the Tiny-ImageNet dataset in open-sourced projects. However, one problem is that the teacher model pre-trained on Tiny-ImageNet seems confidential, so finding an open-source unified model is difficult. In this case, we train the unified resnet-34 teacher model for 200 epochs on the original training data. During the teacher's training, we use the SGD optimizer with the momentum as 0.9, weight decay as  $5e-4$ , the batch size

---

**Algorithm 1** Training process of generation-based methods combined with our KDCI

---

**Input:** A pre-trained teacher model  $T$ , a generator  $g$ , a student model  $S$ , distillation epochs  $T$ , batch size  $N_m$ , the iterations of generator  $g$  in each epoch  $Tg$ , the iterations of student  $f_s$  in each epoch  $Ts$ , the confounder size  $N$ .

```

1: for epoch = [1, ..., T] do
2:   // Generation stage
3:   for generator iterations = [1, ..., Tg] do
4:     Randomly sample noises and labels  $(z, y)$ 
5:     Synthesize a mini-batch training data  $\mathbf{X} = g(z, y)$ 
6:     Update generator  $g$  with the generator loss
7:   end for
8:   Synthesize training data  $\mathbf{X} = g(z, y)$ . Obtain the prediction feature  $M = \{m_j \in \mathbb{R}^d\}_{j=1}^{N_m}$ 
9:   Prototype clustering for  $M$ . Calculate the number of the prediction features in  $i$ -th cluster  $N_i$ , the feature cluster  $\sum_{k=1}^{N_i} m_k^i$  and the subcenter  $z_i = \frac{1}{N_i} \sum_{k=1}^{N_i} m_k^i$ .
10:  Construct a confounder dictionary  $\mathbf{Z} = [z_1, z_2, \dots, z_N]$  and calculate the prototype proportion  $P_s(z_i) = N_i/N_m$ 
11:  // Distillation stage
12:  for student iterations = [1, ..., Ts] do
13:    Synthesize training data  $\mathbf{X} = g(z, y)$ . Get models' predictions  $T(\mathbf{X})$  and  $S(\mathbf{X})$ 
14:    Calculate the prior information:  $F(z) = \sum_{i=1}^N \lambda_i z_i P_s(z_i)$ 
15:    Compensate the student's predictions:  $S'(\mathbf{X}) = \phi(S(\mathbf{X}), F(z))$ 
16:    Update the student  $S$  with  $KD\langle T(\mathbf{X}), S'(\mathbf{X}) \rangle$ 
17:  end for
18: end for
Output: The student model  $S$ .

```

---

as 128, and cosine annealing learning rate with an initial value of 0.1. The teacher model can converge without additional tuning. Based on this pre-trained teacher, we train all students for 200 epochs. For the student, we use the SGD optimizer with the momentum as 0.9, the weight decay as  $1e-4$ , the batch size as 256, the cosine annealing learning rate with an initial value of 0.2 for Fast [10], and 0.1 for DeepInv [1] & DFND [5]. The results are shown in Table 2 of the main body. **For ImageNet**, We choose the same pre-trained resnet-50 model with [14] and unify the teacher model of different baseline methods. For Fast, we test directly on the open-source project. For DeepInv, we reproduce the corresponding results with the specified backbone pair. For DFND, we select 600k samples from the unlabeled Flicker1M dataset. The teacher's backbone is different from the original paper. The different backbones may cause the

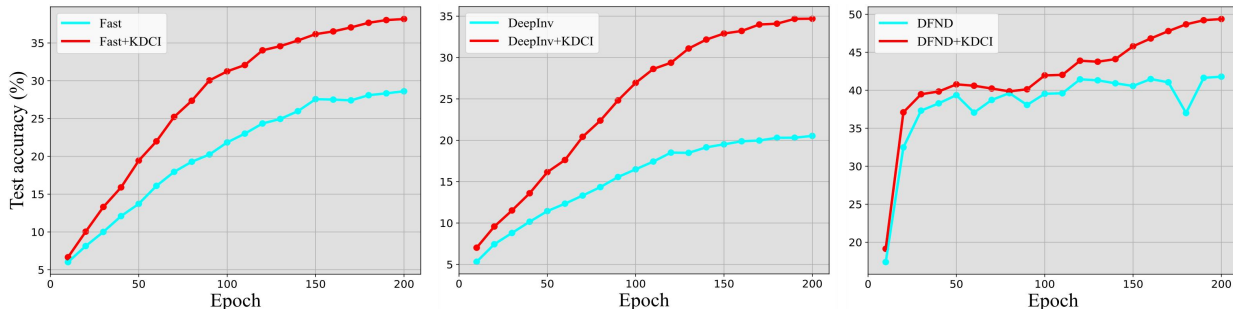

Figure 1. The test accuracy on Tiny-ImageNet dataset across different local training epochs  $E = \{10, 20, \dots, 200\}$ . Our KDCI framework improves the performance of baselines consistently.

061 results we reproduce to differ from the original paper. The  
 062 results are shown in Table 1 of the supplementary material.  
 063 For the implementation of our KDCI, the hidden dimension  
 064  $d_n$  is set to 256. And  $d_h$  equals the hidden dimension  $d$  and  
 065 the number of classes. By default,  $\phi(\cdot)$  uses feature addition.  
 066 For various baseline methods, the settings are shown in  
 067 Section 7 of the supplementary material.

## 068 1.2. Algorithm Process

069 In the existing DFKD task, the generation-based and  
 070 sampling-based method processes are different. There-  
 071 fore, the way KDCI combines these methods and the hy-  
 072 perparameter settings are also slightly different. For the  
 073 generation-based process, the generator and student mod-  
 074 els are updated alternately, which means the student’s train-  
 075 ing data is updated in each epoch. We use a mini-batch of  
 076 synthetic training data to construct the confounder dictio-  
 077 nary, and the dictionary will be updated as the generator is  
 078 updated. For the sampling-based process, existing meth-  
 079 ods select unlabeled data according to the preferences of  
 080 the teacher model. Then, the student relies on these un-  
 081 labeled data for data-based knowledge distillation training.  
 082 We use all sampled data to construct the confounder dictio-  
 083 nary. During subsequent student training, the dictionary is  
 084 fixed. For a clearer understanding, we describe the above  
 085 process as Algorithm 1 and 2, respectively.

## 086 2. Vanilla DFKD Methods vs. Their KDCI- 087 based Versions

088 In the main body, we have compared the quantitative re-  
 089 sults of vanilla DFKD methods and their KDCI-based ver-  
 090 sions. To observe the positive effect of KDCI on the exist-  
 091 ing DFKD methods more clearly, we visualize the student’s  
 092 test accuracy on the Tiny-ImageNet dataset. The results are  
 093 shown in Figure 1. KDCI can consistently help students  
 094 from the beginning of training to the end, which verifies its  
 095 effectiveness.

## Algorithm 2 Training process of sampling-based methods combined with our KDCI

**Input:** A pre-trained teacher model  $T$ , a student model  $S$ , unlabeled training dataset  $D = \{x_j\}_{j=1}^n$ , distillation epochs  $T$ , batch size  $m$ , number of batches  $M$ , the number of sampled data  $N_m$ , the confounder size  $N$ .

- 1: // **Sampling stage**
- 2: Sample the training data  $\{x_j\}_{j=1}^{N_m}$  from  $D$ . Obtain the prediction feature set  $M = \{m_j \in \mathbb{R}^d\}_{j=1}^{N_m}$
- 3: Prototype clustering for  $M$ . Calculate the number of the prediction features in  $i$ -th cluster  $N_i$ , the feature cluster  $\sum_{k=1}^{N_i} m_k^i$  and the subcenter  $z_i = \frac{1}{N_i} \sum_{k=1}^{N_i} m_k^i$ .
- 4: Construct a confounder dictionary  $Z = [z_1, z_2, \dots, z_N]$  and calculate the prototype proportion  $P_s(z_i) = N_i/N_m$
- 5: // **Distillation stage**
- 6: **for** epoch =  $[1, \dots, T]$  **do**
- 7:   **for** mini-batch =  $[1, \dots, M]$  **do**
- 8:     Sample a mini-batch training data:  
 $X = \{x_i\}_{i=1}^m$  from  $\{x_j\}_{j=1}^{N_m}$
- 9:     Get teacher and student predictions  $T(X)$  and  $S(X)$
- 10:     Calculate the prior information:  
 $F(z) = \sum_{i=1}^N \lambda_i z_i P_s(z_i)$
- 11:     Compensate the student’s predictions:  
 $S'(X) = \phi(S(X), F(z))$
- 12:     Update the student  $S$  with  $KD\langle T(X), S'(X) \rangle$
- 13:   **end for**
- 14: **end for**

**Output:** The student model  $S$ .

## 096 3. Analyses of Difference in Performance Im- 097 provements

098 Judging from the experimental results, KDCI has different  
 099 gains for different DFKD methods on different datasets. We  
 100 think such observations arise from various factors.

- By default, we choose the teacher model itself to extract  
 the confounding dictionary. The prediction feature set  
 provided by teachers of different backbones has different  
 expressiveness, which affects the compensation degree of  
 backdoor adjustment for bias during the causal interven-  
 101  
102  
103  
104  
105

tion. The tests in Lines 513-531 and Table. 5 of the main body also verify this conclusion.

- The degree of distribution shift of synthetic data on distinct datasets is different. More complex datasets may degrade the generation quality for generation-based methods, resulting in more significant distribution shifts. KDCI tends to be more effective for more sophisticated datasets.
- Different baseline methods with different training losses are influential. Observations such as Section 4.4 of the main body suggest that methods that already incorporate prior likelihood knowledge of the data may weaken the KDCI gain.
- In addition, there may be many underlying factors. Nevertheless, KDCI, as a model-agnostic general framework, has promising and competitive improvements and gains for various models as a whole. We believe that a deeper exploration of the relevant mechanisms is a promising perspective. For this topic, we leave it to future work.

|               | Ground Truth                                                                                          | Vanilla Fast | w/ KDCI           |
|---------------|-------------------------------------------------------------------------------------------------------|--------------|-------------------|
| CIFAR-10      |  frog               | deer         | frog              |
|               |  ship              | truck        | ship              |
| CIFAR-100     |  sunflowers        | lion         | sunflowers        |
|               |  computer keyboard | bridge       | computer keyboard |
| ImageNet      |  face_powder       | lion         | face_powder       |
|               |  soup_bowl         | dough        | soup_bowl         |
| Tiny-ImageNet |  chest             | binder       | chest             |
|               |  spiny_lobster     | bath_towel   | spiny_lobster     |

Figure 2. Qualitative results of the vanilla and KDCI-based version on CIFAR-10, CIFAR-100, ImageNet, and Tiny-ImageNet.

## 4. More Visual Evidence

To further verify the effectiveness, we provide more case studies of causal intervention. As shown in Figure 2, we visualize some test instances corrected by our KDCI compared to the vanilla version (Fast) on four kinds of datasets (*i.e.*, CIFAR-10, CIFAR-100, ImageNet, and Tiny-ImageNet). The vanilla version sometimes confuses some test instances due to shape or color. Our KDCI can repair these prediction shifts to enhance student performance.

## 5. Discussion with Other Works that Address Distribution Shifts

Several DFKD works already address distribution shifts in adversarial contexts [2, 3, 7, 12]. The works reveal distribution shift issues in the DFKD task from different aspects, but our method is significantly different from these works. Specifically, the differences between our KDCI and others are as follows:

- Applicability.** These existing works tacitly use the same motivation, *i.e.*, as the generator gets updated, the distribution of synthetic data will change, causing the student to forget the knowledge it acquired at previous steps. However, such motivation does not apply to sampling-based methods. After selecting the training samples, they will not change during the entire student training process. Our motivation comes from the observed distribution shifts between the substitution data and can cover the two methods mentioned.
- Economy.** Existing methods often rely on substantial additional computational and storage costs, *e.g.*, the need to store and maintain an additional dynamic collection of generated samples [3], the need for additional generator architectures to memorize knowledge of past generated data (an additional Variational Autoencoder (VAE) [2] or Exponential Moving Average generator [7]), and additional memory bank or additional loss calculation and gradient update [12]. In contrast, our method only needs to compute and store a small number of matrix computation results. Compared with the update of the models, the computational cost of the clustering process is basically negligible.
- Plug-and-play.** Existing works are to propose new methods. Undoubtedly, these methods can provide a potential reference for other DFKD methods, but whether they can be easily combined with existing DFKD methods and improve overall performance is still unknown. Our proposed technique is model-agnostic, as a plug-and-play paradigm that integrates well with existing works. A large number of experiments have proved this conclusion.

173 **6. Further Discussion**174 **6.1. Broader Impact**

175 The positive impact of this work: the proposed KDCI mod- 223  
 176 ule can suppress the distribution shifts between the substi- 224  
 177 tution and original data in the DFKD task, preventing the 225  
 178 potential discrimination of the student’s learning. While 226  
 179 the pre-trained model for extracting prior knowledge uses 227  
 180 the teacher itself, our method does not require additional 228  
 181 dependencies and auxiliary information. The negative im- 229  
 182 pacts of this work: students may be forced to identify mi- 230  
 183 nority groups for malicious purposes with customized bi- 231  
 184 ased teacher models. Therefore, we have to make sure that 232  
 185 the DFKD technique is used for the right purpose. 233

186 **6.2. Limitations**

187 Since there are countless methods with insights for the 234  
 188 DFKD task, other ways of classifying forms may also be 235  
 189 reasonable. In this paper, we simply divide the source of the 236  
 190 substitution data into generation-based and sampling-based 237  
 191 methods. Similarly, it is impossible to cover all DFKD 238  
 192 methods, so only open-source and representative methods 239  
 193 are selected as the baseline. Nevertheless, the existing per- 240  
 194 formance improvement is enough to prove the positive im- 241  
 195 pact of KDCI on students. 242

196 In addition, since what we propose is a framework rather 243  
 197 than a specific method, the test on the effectiveness of KDCI 244  
 198 relies on the experimental setting of the existing DFKD 245  
 199 methods. Currently, the mainstream open-source DFKD 246  
 200 methods rarely use real-life medical or facial datasets for 247  
 201 testing, so we only follow the mainstream experimental 248  
 202 settings. Following the consensus of peers is necessary 249  
 203 to increase the impact of our work. In this work, we 250  
 204 select datasets that are widely used and accepted by the 251  
 205 vast majority of DFKD methods. Following previous data 252  
 206 paradigms is beneficial for acceptance by the relevant re- 253  
 207 search community and enhances the persuasiveness of our 254  
 208 method. 255

209 **7. Experimental Setup of the Baseline DFKD**  
210 **Methods**

211 **DAFL.** DAFL [4] is a data-free generation method. We 256  
 212 keep the generator loss from the original as:  $\mathcal{L}_{GEN} =$  257  
 213  $\mathcal{L}_{oh} + \alpha\mathcal{L}_a + \beta\mathcal{L}_{ie}$ . The knowledge distillation loss is: 258  
 214  $\mathcal{L}_{KD} = D_{KL}(\mathcal{N}_S(x), \mathcal{N}_T(x))$ . Following the original set- 259  
 215 tings, we set  $\alpha = 1e - 3$ ,  $\beta = 20$ . We use SGD with the 260  
 216 weight decay of  $5e - 4$ , the momentum of 0.9, and the initial 261  
 217 learning rate set as 0.1. 262

218 **Fast.** Fast [10] is a fast data-free generation method via fea- 263  
 219 ture sharing. We keep the generator loss from the original 264  
 220 as:  $\mathcal{L}_{GEN} = \alpha\mathcal{L}_{cls} + \beta\mathcal{L}_{adv} + \gamma\mathcal{L}_{feat}$ . The knowledge 265  
 221 distillation loss is:  $\mathcal{L}_{KD} = D_{KL}(\mathcal{N}_S(x), \mathcal{N}_T(x))$ . We set 266  
 222  $\alpha = 0.4$ ,  $\beta = 1.1$ , and  $\gamma = 10$ , which are the same as

the original settings. We use the Adam Optimizer with a 223  
 learning rate of  $1e - 3$  to update the generator and the SGD 224  
 optimizer with a momentum of 0.9 and a learning rate of 225  
 0.1 for student training. 226

**CMI.** CMI [9] is a model inversion method with contrastive 227  
 learning. We keep the generator loss from the original as: 228  
 $\mathcal{L}_{GEN} = \alpha\mathcal{L}_{bn} + \beta\mathcal{L}_{cls} + \gamma\mathcal{L}_{adv} + \delta\mathcal{L}_{cr}$ . The knowledge 229  
 distillation loss is:  $\mathcal{L}_{KD} = D_{KL}(\mathcal{N}_S(x), \mathcal{N}_T(x))$ . We set 230  
 $\alpha = 1$ ,  $\beta = 0.5$ ,  $\gamma = 0.5$ , and  $\delta = 0.8$ . We use the 231  
 Adam Optimizer with a learning rate of  $1e - 3$  to update the 232  
 generator and the SGD optimizer with a momentum of 0.9 233  
 and a learning rate of 0.1 for student training. 234

**DeepInv.** DeepInv [13] is a model inversion method that 235  
 combines prior knowledge and adversarial training. We 236  
 keep the inversion loss from the original as:  $\mathcal{L}_{GEN} =$  237  
 $\alpha_{tv}\mathcal{R}_{tv} + \alpha_{l2}\mathcal{R}_{l2} + \alpha_f\mathcal{R}_{feature} + \alpha_c\mathcal{R}_{compete}$ . The knowl- 238  
 edge distillation loss is:  $\mathcal{L}_{KD} = D_{KL}(\mathcal{N}_S(x), \mathcal{N}_T(x))$ . 239  
 We set  $\alpha_{tv} = 2.5e - 5$ ,  $\alpha_{l2} = 3e - 8$ ,  $\alpha_f = 0.1$  and 240  
 $\alpha_c = 10$ , which are the same as the original setting. Be- 241  
 sides, we set the number of iterations as 1000 and use Adam 242  
 for optimization with a learning rate of 0.05. 243

**DFND.** DFND [5] is a sampling-based method using open- 244  
 world unlabeled data as the substitution data. Following 245  
 the original, we select 600k data with the highest teacher 246  
 confidence from the ImageNet dataset [6] as the sampled 247  
 data and resize them to the resolution of the corresponding 248  
 dataset. We use the same noisy distillation loss  $\mathcal{L}_{KD} =$  249  
 $\mathcal{H}_{CE}(Q(\mathcal{N}_S(x)), \hat{y}) + \lambda D_{KL}(\mathcal{N}_S(x), \mathcal{N}_T(x))$ , and  $\lambda$  is set 250  
 as 4. The student network is optimized using SGD and the 251  
 initial learning rate is set as 0.1. Weight decay and momen- 252  
 tum are set as  $5e - 4$  and 0.9, respectively. 253

**Mosaick.** Mosaick [8] is a sampling-based method using 254  
 out-of-domain (OOD) unlabeled data as the substitu- 255  
 tion data. We select 600k data with the lowest teacher con- 256  
 fidence from the ImageNet dataset [6] as the OOD data. 257  
 Following the original settings, we use Adam for optimiza- 258  
 tion, with hyper-parameters  $lr = 1e - 3$ ,  $\beta_1 = 0.5$ , and 259  
 $\beta_2 = 0.999$  for the generator and discriminator. The distil- 260  
 lation loss is  $\mathcal{L}_{KD} = \lambda D_{KL} - \lambda \mathcal{R}(G, D, T)$ . The student 261  
 network is optimized using SGD, and the initial learning 262  
 rate is set as 0.1. Weight decay and momentum are set as 263  
 $1e - 4$  and 0.9, respectively. 264



265 **References**

- 266 [1] Kartikeya Bhardwaj, Naveen Suda, and Radu Marculescu. Dream distillation: A data-independent model compression  
267 framework. *arXiv preprint arXiv:1905.07072*, 2019. 1  
268
- 269 [2] Kuluhan Binici, Shivam Aggarwal, Nam Trung Pham,  
270 Karianto Leman, and Tulika Mitra. Robust and resource-  
271 efficient data-free knowledge distillation by generative  
272 pseudo replay. In *Proceedings of the AAAI Conference on*  
273 *Artificial Intelligence (AAAI)*, pages 6089–6096, 2022. 3  
274
- 275 [3] Kuluhan Binici, Nam Trung Pham, Tulika Mitra, and  
276 Karianto Leman. Preventing catastrophic forgetting and dis-  
277 tribution mismatch in knowledge distillation via synthetic  
278 data. In *Proceedings of the IEEE/CVF Winter Conference on*  
279 *Applications of Computer Vision (WACV)*, pages 663–671,  
2022. 3
- 280 [4] Hanting Chen, Yunhe Wang, Chang Xu, Zhaohui Yang,  
281 Chuanjian Liu, Boxin Shi, Chunjing Xu, Chao Xu, and Qi  
282 Tian. Data-free learning of student networks. In *Proceedings*  
283 *of the IEEE/CVF International Conference on Computer Vi-*  
284 *sion (ICCV)*, pages 3514–3522, 2019. 4
- 285 [5] Hanting Chen, Tianyu Guo, Chang Xu, Wenshuo Li, Chun-  
286 jing Xu, Chao Xu, and Yunhe Wang. Learning student net-  
287 works in the wild. In *Proceedings of the IEEE/CVF Confer-*  
288 *ence on Computer Vision and Pattern Recognition (CVPR)*,  
289 pages 6428–6437, 2021. 1, 4
- 290 [6] Jia Deng, Wei Dong, Richard Socher, Li-Jia Li, Kai Li,  
291 and Li Fei-Fei. Imagenet: A large-scale hierarchical im-  
292 age database. In *Proceedings of the IEEE/CVF Conference*  
293 *on Computer Vision and Pattern Recognition (CVPR)*, pages  
294 248–255. Ieee, 2009. 4
- 295 [7] Kien Do, Thai Hung Le, Dung Nguyen, Dang Nguyen,  
296 Haripriya Harikumar, Truyen Tran, Santu Rana, and Svetha  
297 Venkatesh. Momentum adversarial distillation: Handling  
298 large distribution shifts in data-free knowledge distilla-  
299 tion. *Advances in Neural Information Processing Systems*  
300 *(NeurIPS)*, 35:10055–10067, 2022. 3
- 301 [8] Gongfan Fang, Yifan Bao, Jie Song, Xinchao Wang, Donglin  
302 Xie, Chengchao Shen, and Mingli Song. Mosaicking to dis-  
303 till: Knowledge distillation from out-of-domain data. *Ad-*  
304 *vances in Neural Information Processing Systems (NeurIPS)*,  
305 34:11920–11932, 2021. 4
- 306 [9] Gongfan Fang, Jie Song, Xinchao Wang, Chengchao Shen,  
307 Xingen Wang, and Mingli Song. Contrastive model inver-  
308 sion for data-free knowledge distillation. *arXiv preprint*  
309 *arXiv:2105.08584*, 2021. 4
- 310 [10] Gongfan Fang, Kanya Mo, Xinchao Wang, Jie Song, Shitao  
311 Bei, Haofei Zhang, and Mingli Song. Up to 100x faster data-  
312 free knowledge distillation. In *Proceedings of the AAAI Con-*  
313 *ference on Artificial Intelligence (AAAI)*, pages 6597–6604,  
314 2022. 1, 4
- 315 [11] Adam Paszke, Sam Gross, Francisco Massa, Adam Lerer,  
316 James Bradbury, Gregory Chanan, Trevor Killeen, Zeming  
317 Lin, Natalia Gimelshein, Luca Antiga, et al. Pytorch: An im-  
318 perative style, high-performance deep learning library. *Ad-*  
319 *vances in Neural Information Processing Systems (NeurIPS)*,  
320 32, 2019. 1
- [12] Gaurav Patel, Konda Reddy Mopuri, and Qiang Qiu. Learn-  
ing to retain while acquiring: Combating distribution-shift  
in adversarial data-free knowledge distillation. In *Proceed-*  
*ings of the IEEE/CVF Conference on Computer Vision and*  
*Pattern Recognition (CVPR)*, pages 7786–7794, 2023. 3
- [13] Hongxu Yin, Pavlo Molchanov, Jose M Alvarez, Zhizhong  
Li, Arun Mallya, Derek Hoiem, Niraj K Jha, and Jan Kautz.  
Dreaming to distill: Data-free knowledge transfer via deep-  
inversion. In *Proceedings of the IEEE/CVF Conference on*  
*Computer Vision and Pattern Recognition (CVPR)*, pages  
8715–8724, 2020. 4
- [14] Borui Zhao, Quan Cui, Renjie Song, Yiyu Qiu, and Jiajun  
Liang. Decoupled knowledge distillation. In *Proceedings of*  
*the IEEE/CVF Conference on Computer Vision and Pattern*  
*Recognition (CVPR)*, pages 11953–11962, 2022. 1
